# Supplementary material
Source: PubMed Central journal article supplement (PMC9311268)
Supplement: NIHMS1799297-supplement-Supplementary_Fig_1.pdf [file NIHMS1799297-supplement-Supplementary_Fig_1.pdf]

**Supplementary Figure 1 – Tools for virus transduction and device implantation**

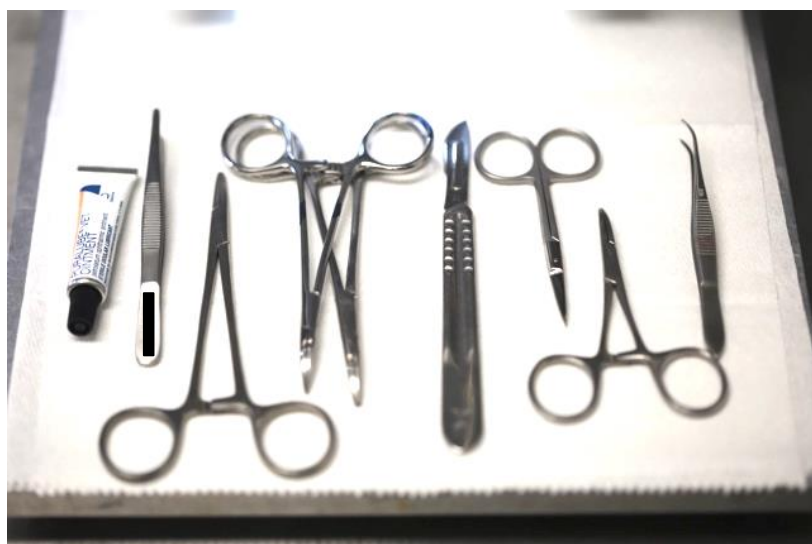

**Supplementary Figure 1: Tools for virus transduction and device implantation.**
